# Supplementary material for: Substrate specific closed-loop optimization of carbohydrate protective group chemistry using Bayesian optimization and transfer learning
Source: Chem Sci. 2023 May 18;14(23):6319–29. doi: 10.1039/d3sc01261a (PMC10266441; doi:10.1039/d3sc01261a)
Supplement: SC-014-D3SC01261A-s001 [file SC-014-D3SC01261A-s001.xlsx]

## Sheet: CL1 (mono-gluco)
Experiment number	Result	Yield (%)	Benzoylating Reagent	Benzoylating Reagent Name	Eq. Benzoylating Reagent	Base	Base Name	Eq. base	Concentration (M)	t1 (min)	Solvent	Yields Di (%)		Details
1	1	0	2	Bz2O	3.33333	6	2,6-lutidine	6.85897	0.109615	6	dmf_thf	0		Reaction	Monobenzoylation of beta-glucoside
2	1	0	2	Bz2O	3.84615	7	2-methylpyridine	12.6282	0.0680769	10	mecn_thf	0		C sugar stock solution (M)	1.2
3	0.8386	31.2396	1	BzCl	4.35897	6	2,6-lutidine	16.0897	0.0403846	15	mecn	0		High xi	1
4	1	0	1	BzCl	4.87179	1	Triethylamine	4.55128	0.075	17	mecn_dioxane	0		Low xi	0.01
5	1	0	2	Bz2O	2.82051	8	Pyridine	8.01282	0.0888462	7	dioxane	0		xi changeover	48
6	1	0	1	BzCl	2.5641	3	DBU	9.16667	0.0957692	18	mecn_dmf	0		Scoring function	abs(1 - (area/40))
7	1	0	1	BzCl	1.79487	8	Pyridine	2.24359	0.116538	3	dmf_dioxane	0		max area (100% yield)	20.6661
8	1	0	2	Bz2O	4.61538	9	Aniline	11.4744	0.0819231	9	dmf	0		Reaction Space	See Figure 2
9	1	0	2	Bz2O	3.58974	4	2,4,6-collidine	5.70513	0.0473077	20	mecn	0
10	1	0	1	BzCl	2.30769	2	DIPEA	14.9359	0.0334615	14	dioxane	0
11	1	0	1	BzCl	2.05128	2	DIPEA	3.39744	0.102692	1	thf	0
12	1	0	2	Bz2O	4.10256	4	2,4,6-collidine	10.3205	0.0542308	4	dmf	0
13	1	0	2	Bz2O	1.80556	2	DIPEA	2.29167	0.06375	10	thf	0
14	0.911125	17.2021	2	Bz2O	1.75864	1	Triethylamine	3.86984	0.104961	19	dioxane_thf	0
15	1	0	1	BzCl	4.94006	2	DIPEA	16.1747	0.107196	2	dioxane_thf	0
16	1	0	1	BzCl	5	9	Aniline	16.6667	0.03	1	mecn	0
17	1	0	1	BzCl	5	9	Aniline	16.6667	0.03	1	mecn	0
18	1	0	1	BzCl	5	9	Aniline	16.6667	0.0916687	19	mecn	0
19	1	0	2	Bz2O	2.32587	9	Aniline	12.3375	0.0973974	1	mecn	0
20	0.8945	20.4199	1	BzCl	2.2041	1	Triethylamine	6.24708	0.0842157	8	mecn	0
21	1	0	2	Bz2O	1.93965	5	2,4-lutidine	3.67782	0.0853434	19	dioxane_thf	0
22	1	0	1	BzCl	1.7788	1	Triethylamine	3.30401	0.0308507	20	mecn	0
23	0.832275	32.4638	1	BzCl	5	6	2,6-lutidine	16.6667	0.03	1	mecn	0
24	1	0	2	Bz2O	4.72087	9	Aniline	9.1459	0.106534	11	mecn	0
25	1	0	1	BzCl	4.89229	6	2,6-lutidine	2.45118	0.0335397	6	mecn_dioxane	0
26	1	0	1	BzCl	4.8395	6	2,6-lutidine	2.82411	0.0306623	19	mecn_dioxane	0
27	0.9488	9.90994	1	BzCl	4.90944	6	2,6-lutidine	3.62344	0.117805	3	thf	0
28	0.891425	21.0151	1	BzCl	2.17863	6	2,6-lutidine	16.6667	0.03	3	mecn	0
29	1	0	2	Bz2O	1.91858	9	Aniline	16.5133	0.095211	3	mecn_dioxane	0
30	1	0	2	Bz2O	2.5177	9	Aniline	15.5025	0.0985442	1	mecn_dioxane	0
31	0.760675	46.3222	1	BzCl	5	6	2,6-lutidine	16.6667	0.10109	5	mecn	0
32	0.8035	38.0333	2	Bz2O	4.94228	1	Triethylamine	12.2883	0.0834611	1	dmf_thf	29.5528
33	1	0	2	Bz2O	2.69728	7	2-methylpyridine	2.16073	0.116161	18	mecn	0
34	1	0	1	BzCl	4.98176	5	2,4-lutidine	16.1401	0.105687	6	dioxane	0
35	0.842625	30.4605	2	Bz2O	1.7606	1	Triethylamine	16.0313	0.0903507	2	dmf	9.57478
36	0.7587	46.7045	1	BzCl	5	6	2,6-lutidine	16.6667	0.0999499	4	mecn	0
37	0.7673	45.0399	2	Bz2O	4.8371	1	Triethylamine	16.1961	0.0306051	2	mecn_thf	21.5231
38	0.92005	15.4746	2	Bz2O	3.82172	1	Triethylamine	16.2731	0.0392183	3	mecn_dmf	12.6867
39	0.714675	55.2257	2	Bz2O	3.47901	1	Triethylamine	16.6667	0.0717958	1	mecn_thf	36.5834
40	0.88875	21.5328	1	BzCl	4.56511	4	2,4,6-collidine	5.17758	0.117358	3	mecn	0
41	1	0	1	BzCl	4.05425	7	2-methylpyridine	15.4425	0.105486	2	mecn_dmf	0
42	0.73415	51.4563	2	Bz2O	3.62264	1	Triethylamine	16.6667	0.0814305	1	mecn_thf	40.2352
43	1	0	2	Bz2O	4.08153	9	Aniline	13.9553	0.11863	9	thf	0
44	0.744525	49.4481	2	Bz2O	2.44557	1	Triethylamine	16.5872	0.0476153	1	mecn_thf	17.9644
45	1	0	2	Bz2O	1.97932	1	Triethylamine	11.8289	0.0300369	2	dmf_dioxane	0
46	0.73025	52.2111	2	Bz2O	4.4624	1	Triethylamine	15.4411	0.0909039	18	dmf_dioxane	30.6542
47	1	0	2	Bz2O	4.98623	5	2,4-lutidine	12.7331	0.105555	20	dmf_dioxane	0
48	0.902875	18.7989	2	Bz2O	4.5188	1	Triethylamine	11.2265	0.0997239	7	mecn	64.7616
49	0.799975	38.7156	2	Bz2O	2.78353	1	Triethylamine	16.6062	0.109536	1	mecn	54.4608
50	0.731075	52.0514	2	Bz2O	3.56762	1	Triethylamine	16.6667	0.0605941	2	mecn_thf	33.9616
51	0.771475	44.2319	2	Bz2O	5	1	Triethylamine	16.6667	0.110749	15	dmf_dioxane	54.0234
52	0.723475	53.5224	2	Bz2O	3.08484	1	Triethylamine	16.6667	0.0711771	1	mecn_thf	35.7674
53	0.713425	55.4677	2	Bz2O	2.66743	1	Triethylamine	16.6667	0.0746931	1	mecn_thf	29.9809
54	0.732775	51.7224	2	Bz2O	3.30014	1	Triethylamine	16.6667	0.0685138	1	mecn_thf	36.8409
55	0.695525	58.9323	2	Bz2O	2.55752	1	Triethylamine	16.6667	0.0862369	1	mecn_thf	28.8143
56	0.7003	58.008	2	Bz2O	2.4341	1	Triethylamine	16.6667	0.0857754	2	mecn_thf	25.42
57	0.688525	60.2871	2	Bz2O	1.66667	1	Triethylamine	16.6667	0.116214	4	mecn_thf	15.4233
58	0.6889	60.2146	2	Bz2O	1.97388	1	Triethylamine	16.6667	0.103341	1	mecn_thf	19.8384
59	0.687925	60.4033	2	Bz2O	1.79663	1	Triethylamine	16.6667	0.109968	1	mecn_thf	20.2386
60	0.681775	61.5936	2	Bz2O	1.90591	1	Triethylamine	16.6667	0.110374	2	mecn_thf	20.9584
61	0.67815	62.2953	2	Bz2O	1.89588	1	Triethylamine	16.6667	0.108809	2	mecn_thf	21.4424
62	0.68265	61.4243	2	Bz2O	2.04336	1	Triethylamine	16.6667	0.110906	3	mecn_thf	20.7816
63	0.676675	62.5807	2	Bz2O	2.13066	1	Triethylamine	16.6667	0.113099	3	mecn_thf	26.9031
64	0.6834	61.2791	2	Bz2O	2.09024	1	Triethylamine	16.6667	0.111761	3	mecn_thf	19.7546
65	0.698425	58.371	2	Bz2O	2.25381	1	Triethylamine	16.6667	0.118916	3	mecn_thf	31.4019
66	0.6965	58.7435	2	Bz2O	2.17995	1	Triethylamine	16.6667	0.11527	3	mecn_thf	29.6334
67	0.69685	58.6758	2	Bz2O	1.91731	1	Triethylamine	16.6667	0.10282	4	mecn_thf	20.9243
68	0.690275	59.9484	2	Bz2O	1.82055	1	Triethylamine	16.6667	0.10191	4	mecn_thf	21.4921
69	0.6841	61.1436	2	Bz2O	1.79168	1	Triethylamine	16.6667	0.111979	1	mecn_thf	16.2982
70	0.7248	53.266	2	Bz2O	1.84124	1	Triethylamine	16.6667	0.109956	1	mecn_thf	23.8718

## Sheet: CL2 (mono-gluco)
Experiment number	Result	Yield (%)	Eq. Benzoylating Reagent	Eq. base	Concentration (M)	t1 (min)	Ratio*	Yields Di (%)		Details
25	0.84333	30.3241	4.79167	10.6389	0.0345	13	1.83333	0		Reaction	Monobenzoylation of beta-glucoside
26	0.69145	59.721	4.51389	26.6944	0.0495	13	3.5	0		C sugar stock solution (M)	1.2
27	0.732205	51.8327	2.29167	21.9722	0.0765	1	0.5	0		High xi	1
28	0.678598	62.2086	2.84722	17.25	0.0885	12	1.83333	0		Low xi	0.05
29	0.812662	36.2599	1.04167	5.91667	0.1035	8	5.83333	0		xi changeover	36
30	0.87441	24.3084	4.79167	15.3611	0.1095	6	5.5	0		Scoring function	abs((1 - (area/40))
31	0.697662	58.5185	2.56944	27.6389	0.0705	6	0.833333	0		max area (100% yield)	20.6661
32	0.813618	36.075	3.72326	29.577	0.0427381	14	9.96724	0		Reaction Space	See Figure S10
33	0.8631	26.4975	1.05534	23.8923	0.0403046	18	9.99699	9.6477
34	0.896088	20.1126	1.15561	1.66667	0.12	1	4.18497	0		* 0-10
35	0.932075	13.1471	4.91959	2.54203	0.115909	2	8.2364	45.2742		0 = 100% THF
36	0.990775	1.78553	0.991028	4.21701	0.0348674	15	0.293723	0		10 = 100% MeCN
37	0.945025	10.6406	2.07088	2.09229	0.0325531	19	9.66377	0
38	0.66	65.8083	3.14372	30	0.12	20	0	19.5935
39	0.650075	67.7293	2.88071	30	0.12	20	0	17.4058
40	0.766275	45.2383	3.23272	29.962	0.111761	2	9.78988	35.564
41	0.881925	22.8539	0.833333	23.7445	0.12	20	0	0
42	0.842625	30.4605	3.59807	2.13185	0.114582	19	0.732301	0
43	0.884875	22.2829	4.88316	19.9064	0.0709003	20	8.27049	44.8752
44	0.923625	14.7827	4.91646	19.8606	0.0964331	19	9.11679	48.9333
45	0.750725	48.2481	1.57597	18.6623	0.12	1	0	0
46	0.672825	63.3259	3.68218	30	0.12	7	0	21.4062
47	0.66765	64.3276	3.84192	29.6627	0.118585	2	0.270752	24.5316
48	0.780975	42.3931	0.834835	28.494	0.117102	19	9.40552	0
49	0.76955	44.6044	1.12842	27.6366	0.118196	18	9.3142	5.09672
50	0.849975	29.0379	5	30	0.03	1	0	0
51	0.86555	26.0233	1.16955	29.7341	0.0386609	3	9.81192	9.45297
52	0.93555	12.4745	1.15104	28.8488	0.0360882	20	1.99384	0
53	0.6656	64.7244	2.74156	30	0.118056	10	3.58124	19.4156
54	0.6732	63.2533	2.68101	30	0.12	8	3.48205	21.5408
55	0.68	61.9372	3.73254	30	0.0737637	20	0.77293	11.4868
56	0.947325	10.1954	1.37551	3.21137	0.0329858	2	9.9034	0
57	0.920175	15.4504	4.67694	2.66535	0.0304111	1	9.96605	10.9892
58	0.679525	62.0291	3.50095	30	0.082645	10	2.89431	21.5721
59	0.688525	60.2871	3.54526	30	0.0802361	9	3.28529	23.5387
60	0.659575	65.8905	3.06559	23.3688	0.12	13	0	15.6027
61	0.66105	65.605	3.10692	22.911	0.12	13	0	15.0449
62	0.70415	57.2629	3.03312	25.5506	0.12	20	2.9572	24.7167
63	0.75205	47.9916	5	30	0.12	20	0	36.2083
64	0.6616	65.4986	2.72164	30	0.12	1	0	14.9728
65	0.665475	64.7485	2.85486	30	0.106097	13	0	10.6598
66	0.652575	67.2454	2.87074	30	0.105212	13	0	12.7875
67	0.762425	45.9835	1.10153	30	0.12	1	6.18104	0
68	0.683525	61.2549	1.61461	30	0.12	1	5.27554	8.23408
69	0.8736	24.4652	5	30	0.03	20	0	0

## Sheet: CL3 (di-gluco)
Experiment number	Result	Yield (%)	Eq. Benzoylating Reagent	Eq. base	Concentration (M)	t1 (min)	Ratio*		Details
1	0.474225	50.5609	3.38566	2.7606	0.142957	10	9.2652		Reaction	Dibenzoylation of beta-glucoside
2	0.471952	50.7794	3.38566	2.76053	0.142957	10	9.26521		C sugar stock solution (M)	1.2
3	0.68885	29.9216	5.76837	1.15507	0.111662	16	9.75042		High xi	1
4	0.389	58.7565	4.52189	13.5231	0.112577	8	9.55271		Low xi	0.02
5	0.346475	62.8459	5.71245	24.6598	0.134714	2	9.08801		xi changeover	24
6	0.541825	44.0602	5.77865	24.7408	0.0473334	9	8.52286		Scoring function	abs(1 - (area/40))
7	0.3287	64.5552	4.88373	20.8556	0.142957	1	9.58585		max area (100% yield)	41.5954
8	0.67005	31.7295	5.84874	3.38696	0.131765	8	0.233241		Reaction Space
9	0.88835	10.7368	5.65875	1.18444	0.14011	9	0.163039
10	0.4149	56.2658	5.78589	23.8701	0.142357	2	2.22341		* 0-10
11	0.35655	61.877	5.81045	21.9342	0.135303	17	5.36426		0 = 100% THF
12	0.337725	63.6873	5.16494	25.1825	0.130899	10	10		10 = 100% MeCN
13	0.502975	47.7962	5.80346	24.8569	0.0494818	8	1.89758
14	0.7844	20.7331	5.84013	22.6981	0.0608624	20	0.668111
15	1	0	5.5601	1.43429	0.037224	3	4.81387
16	0.87865	11.6696	5.8755	3.96721	0.0390525	2	5.0571
17	0.39145	58.5209	5.87591	25.1825	0.142957	6	6.06412
18	0.301575	67.1637	5.8559	24.7489	0.13998	19	8.78563
19	0.54695	43.5673	4.60128	1.98648	0.141362	19	9.9302
20	0.506025	47.5028	5.33181	25.1825	0.142957	20	7.74151
21	0.665	32.2151	4.54457	24.9917	0.0396221	4	9.96891
22	0.6336	35.2347	5.47307	14.5406	0.0359339	19	9.92234
23	0.6576	32.9267	5.29692	12.0362	0.0360194	20	9.94201
24	0.353025	62.216	5.87591	25.1825	0.142957	11	10
25	0.825925	16.7398	2.43226	1.2784	0.138879	20	7.35203
26	0.32665	64.7524	5.87591	25.1825	0.129856	15	8.19572
27	0.381125	59.5138	5.87591	25.1825	0.129655	15	8.19824
28	0.318825	65.5048	5.25832	14.8417	0.142957	3	10
29	0.383275	59.307	5.28022	14.9486	0.142957	3	10
30	0.31345	66.0217	5.17793	20.5029	0.142957	4	10
31	0.34695	62.8002	5.22453	24.8387	0.142957	2	10
32	0.305875	66.7502	5.87591	25.1825	0.142957	14	3.28546
33	0.366075	60.9611	5.87591	25.1825	0.117797	20	10
34	0.3345	63.9975	5.87591	25.1825	0.142957	13	3.50749
35	0.33685	63.7715	5.87591	25.1825	0.12977	11	3.81943

## Sheet: CL4 (mono-manno)
Experiment number	Result	Yield (%)	Benzoylating Reagent	Benzoylating Reagent Name	Eq. Benzoylating Reagent	Base	Base Name	eq. base	Concentration (M)	t1 (min)	solvent	Yield Di (%)		Details
1	0.794987	37.2112	2	Bz2O	2.42759	1	Triethylamine	28.7421	0.104732	3	mecn_thf	34.0706		Reaction	monobenzoylation of alpha-thiomannoside
2	0.809823	34.5185	2	Bz2O	3.48543	1	Triethylamine	25.3375	0.0934587	7	mecn_thf	0		C sugar stock solution (M)	1.1
3	0.93325	12.1156	1	BzCl	6.7752	1	Triethylamine	27.3425	0.0678685	20	dmf_thf	0		High xi	1
4	0.96435	6.47072	1	BzCl	0.593024	6	2,6-lutidine	29.3364	0.111865	17	mecn	0		Low xi	0.01
5	1	0	1	BzCl	0.501543	9	Aniline	27.6722	0.0333131	2	dioxane	0		xi changeover	38
6	0.7566	44.1788	2	Bz2O	2.40027	1	Triethylamine	29.0408	0.112063	13	thf	21.3975		Scoring function	abs(1 - (area/80))
7	1	0	2	Bz2O	6.89998	9	Aniline	29.9547	0.119098	18	mecn_thf	0		max area (100% yield)	44.0755
8	1	0	1	BzCl	6.9986	9	Aniline	3.64575	0.107771	20	dioxane_thf	0		Reaction Space	See Figure 6
9	0.778962	40.1198	2	Bz2O	4.01199	1	Triethylamine	24.396	0.0906925	1	thf	27.7299
10	0.926025	13.427	2	Bz2O	6.87026	1	Triethylamine	1.24332	0.117785	17	thf	8.70605
11	1	0	1	BzCl	0.680669	1	Triethylamine	28.768	0.116127	15	dmf	0
12	1	0	1	BzCl	0.669283	1	Triethylamine	28.1574	0.113894	6	dmf_thf	0
13	0.931375	12.4559	2	Bz2O	6.70292	4	2,4,6-collidine	26.9396	0.0364402	5	mecn	0
14	0.796687	36.9026	2	Bz2O	3.02407	1	Triethylamine	26.3377	0.0958041	17	dmf_dioxane	23.9288
15	1	0	2	Bz2O	0.798208	9	Aniline	4.83277	0.0372783	19	dmf	0
16	1	0	2	Bz2O	0.957779	9	Aniline	1.39907	0.0303569	19	dmf_dioxane	0
17	0.850513	27.133	2	Bz2O	6.88516	1	Triethylamine	29.5911	0.101436	5	dioxane	59.9049
18	0.736663	47.7976	2	Bz2O	3.68781	1	Triethylamine	25.0884	0.11672	19	thf	48.4302
19	1	0	2	Bz2O	1.0731	2	DIPEA	1.29959	0.102575	2	mecn_dioxane	0
20	0.944562	10.0623	2	Bz2O	3.41456	2	DIPEA	27.9192	0.119648	5	thf	23.8142
21	0.782162	39.539	2	Bz2O	4.1329	1	Triethylamine	28.2593	0.0608582	19	thf	16.2369
22	0.968787	5.66529	1	BzCl	6.97137	6	2,6-lutidine	29.089	0.0723293	2	dmf_dioxane	0
23	0.736037	47.911	1	BzCl	6.86303	6	2,6-lutidine	29.1952	0.0442993	2	mecn_thf	4.62109
24	0.9394	10.9993	1	BzCl	1.19427	4	2,4,6-collidine	27.706	0.0305595	1	mecn_thf	0
25	0.886575	20.5874	1	BzCl	6.99003	5	2,4-lutidine	20.2688	0.0352163	2	mecn_thf	11.2556
26	0.830225	30.8153	1	BzCl	6.70624	5	2,4-lutidine	29.9126	0.0534264	12	mecn_thf	20.5642
27	1	0	2	Bz2O	6.97162	7	2-methylpyridine	24.0178	0.0349022	14	dmf_thf	0
28	1	0	2	Bz2O	6.99067	7	2-methylpyridine	22.1007	0.0387268	19	dmf_thf	0
29	0.875812	22.5409	1	BzCl	6.3448	6	2,6-lutidine	29.6299	0.0966885	12	mecn_thf	8.53176
30	0.973387	4.83036	1	BzCl	6.4618	1	Triethylamine	1.80415	0.034003	18	mecn_thf	0
31	0.969863	5.47016	1	BzCl	6.86161	1	Triethylamine	11.2675	0.044152	3	dmf_dioxane	0
32	1	0	1	BzCl	6.96175	9	Aniline	27.5224	0.040971	2	mecn_dmf	0
33	1	0	2	Bz2O	0.728843	6	2,6-lutidine	17.7189	0.0310902	1	mecn_dmf	0
34	1	0	2	Bz2O	1.2541	5	2,4-lutidine	1.49777	0.0342892	19	mecn_dmf	0
35	0.96	7.26028	2	Bz2O	6.90425	5	2,4-lutidine	5.7076	0.110182	20	mecn_dioxane	0
36	1	0	2	Bz2O	6.69475	5	2,4-lutidine	1.06963	0.113092	19	dmf	0
37	1	0	2	Bz2O	0.541638	1	Triethylamine	25.9541	0.0425838	11	dioxane	0
38	0.827425	31.3236	2	Bz2O	1.08049	1	Triethylamine	29.168	0.119927	20	dioxane	4.74559
39	1	0	1	BzCl	0.530283	9	Aniline	14.4975	0.102274	20	dmf_thf	0
40	0.742575	46.7244	2	Bz2O	3.99825	1	Triethylamine	27.6397	0.103721	17	dioxane_thf	38.7266
41	0.876037	22.5001	2	Bz2O	3.34347	1	Triethylamine	26.4704	0.114285	20	mecn	55.2108
42	0.890912	19.8001	2	Bz2O	3.75653	1	Triethylamine	26.7621	0.0943663	18	mecn_dmf	49.8544
43	0.754525	44.5554	2	Bz2O	2.69876	1	Triethylamine	26.0357	0.111008	3	dioxane_thf	21.1236
44	0.759375	43.6751	2	Bz2O	2.2632	1	Triethylamine	28.4181	0.117961	2	dioxane_thf	17.3938
45	0.761425	43.303	2	Bz2O	5.25616	1	Triethylamine	28.4394	0.0701793	1	dioxane_thf	26.8501
46	0.845175	28.1018	2	Bz2O	6.12954	1	Triethylamine	27.004	0.104842	10	dioxane_thf	57.284
47	0.881	21.5993	2	Bz2O	0.987166	1	Triethylamine	28.9789	0.0833131	20	dioxane_thf	0

## Sheet: CL5 (di-manno)
Experiment number	Result	Yield (%)	Benzoylating Reagent	Benzoylating Reagent Name	Eq. Benzoylating Reagent	Base	Base Name	Eq. Base	Concentration (M)	t1 (min)	solvent		Details
1	0.471687	70.1546	2	Bz2O	6.37065	1	Triethylamine	28.6025	0.14046	14	mecn		Reaction	dibenzoylation of alpha-thiomannoside
2	0.527412	62.7549	2	Bz2O	6.07231	1	Triethylamine	26.4964	0.124958	5	mecn		C sugar stock solution (M)	1.1
3	0.557075	58.816	2	Bz2O	5.75802	2	DIPEA	22.8679	0.123156	10	mecn		High xi	1
4	0.40825	78.5785	2	Bz2O	8.21643	2	DIPEA	24.1087	0.137837	7	mecn_dmf		Low xi	0.005
5	0.335537	88.234	2	Bz2O	6.12164	1	Triethylamine	29.7611	0.127745	18	dmf_thf		xi changeover	20
6	0.389513	81.0667	2	Bz2O	6.27917	2	DIPEA	27.2034	0.137435	7	mecn_dmf		Scoring function	abs(1 - (area/80))
7	0.414162	77.7934	2	Bz2O	6.80061	2	DIPEA	28.758	0.126153	11	mecn_dmf		max area (100% yield)	60.2455
8	0.472387	70.0617	2	Bz2O	7.34602	2	DIPEA	29.9014	0.14223	16	dmf		Reaction Space	See Figure 6
9	0.376825	82.7514	2	Bz2O	5.65474	1	Triethylamine	29.6549	0.134605	10	dmf
10	0.43515	75.0065	2	Bz2O	8.29602	1	Triethylamine	28.6639	0.138211	12	dmf_dioxane
11	0.309487	91.6932	2	Bz2O	6.51584	1	Triethylamine	26.4969	0.139448	9	dmf_dioxane
12	0.480725	68.9546	2	Bz2O	8.64696	1	Triethylamine	12.7052	0.140024	8	dmf_thf
13	0.448038	73.2951	2	Bz2O	6.57036	1	Triethylamine	29.1526	0.130355	9	dmf_thf
14	0.389188	81.1098	2	Bz2O	7.01393	1	Triethylamine	22.985	0.141662	14	mecn_dioxane
15	0.436225	74.8637	2	Bz2O	6.76848	1	Triethylamine	26.7016	0.117554	13	mecn_dioxane
16	0.519487	63.8073	2	Bz2O	8.91539	1	Triethylamine	8.78462	0.134045	8	mecn_thf
17	0.432438	75.3667	2	Bz2O	6.33434	2	DIPEA	23.291	0.14108	9	dmf_dioxane
18	0.472025	70.1098	2	Bz2O	5.49011	1	Triethylamine	23.5249	0.141722	19	dmf_dioxane
19	1	0	1	BzCl	8.19499	1	Triethylamine	21.6229	0.135927	2	mecn_dmf
20	0.285112	94.9299	2	Bz2O	8.05071	1	Triethylamine	11.4699	0.142042	15	dioxane
21	0.6669	44.2324	2	Bz2O	8.45269	1	Triethylamine	2.3467	0.137916	18	dioxane
22	0.485712	68.2923	2	Bz2O	5.76573	1	Triethylamine	15.6809	0.139012	18	dioxane
23	0.627738	49.4328	2	Bz2O	6.98638	2	DIPEA	14.6939	0.13588	16	dioxane
24	0.622125	50.178	2	Bz2O	8.60089	2	DIPEA	18.9746	0.113145	12	dioxane

## Sheet: CL6 (di-galacto)
Experiment number	Result	Yield (%)	Benzoylating Reagent	Benzoylating Reagent Name	Eq. Benzoylating Reagent	Base	Base Name	Eq. Base	Concentration (M)	t1 (min)	solvent	Yield Mono (%)		Details
1	0.38542	79.8435	2	Bz2O	6.66146	1	Triethylamine	24.2412	0.139877	10	mecn	0		Reaction	dibenzoylation of beta-galactoside
2	0.545769	59.0116	2	Bz2O	7.87575	1	Triethylamine	27.0483	0.140047	11	mecn	0		C sugar stock solution (M)	1.3
3	1	0	1	BzCl	0.763991	9	Aniline	7.3072	0.0541085	17	mecn_thf	0		High xi	1
4	0.491062	66.119	2	Bz2O	6.17055	1	Triethylamine	25.1316	0.135129	3	dmf_dioxane	18.4347		Low xi	0.01
5	0.4236	74.8833	2	Bz2O	6.59733	1	Triethylamine	20.8886	0.124923	13	mecn_dmf	10.2046		xi changeover	18
6	0.485923	66.7866	2	Bz2O	4.37148	1	Triethylamine	21.8406	0.141046	10	mecn	18.2328		Scoring function	abs(1 - (area/65))
7	0.380708	80.4557	2	Bz2O	7.38662	1	Triethylamine	21.3682	0.130813	8	dmf	4.43871		max area (100% yield)	50.0325
8	0.596492	52.4219	2	Bz2O	7.22743	1	Triethylamine	18.9684	0.140903	10	dmf	0		Reaction Space	See Figure 6
9	0.505092	64.2962	2	Bz2O	6.61967	1	Triethylamine	14.4067	0.132251	8	mecn	0
10	0.560892	57.0469	2	Bz2O	8.82113	1	Triethylamine	26.3699	0.12713	5	mecn_dioxane	0
11	0.387462	79.5783	2	Bz2O	8.70767	1	Triethylamine	28.3265	0.124299	2	mecn_thf	4.84708
12	0.662077	43.9015	2	Bz2O	6.9741	1	Triethylamine	28.8898	0.12483	17	dioxane	16.4276
13	0.446415	71.9193	2	Bz2O	6.49553	1	Triethylamine	24.4386	0.134902	11	dmf_thf	12.1351
14	0.422185	75.0672	2	Bz2O	7.72724	1	Triethylamine	26.6454	0.0695732	3	dmf	17.3604
15	0.342615	85.4045	2	Bz2O	7.38405	1	Triethylamine	29.569	0.135574	3	mecn_thf	9.89835
16	0.492662	65.9112	2	Bz2O	7.75353	1	Triethylamine	21.5117	0.11418	2	dioxane_thf	27.9316
17	0.320692	88.2526	2	Bz2O	8.47288	1	Triethylamine	28.1628	0.102332	5	dmf	6.86572
18	0.312229	89.3521	2	Bz2O	8.22407	2	DIPEA	29.4154	0.122229	3	thf	13.5621
19	0.330806	86.9387	2	Bz2O	6.87917	2	DIPEA	24.6887	0.11525	6	dmf	8.74516
20	0.409308	76.7401	2	Bz2O	8.1998	2	DIPEA	26.2995	0.12503	7	thf	10.8427
21	0.448831	71.6055	2	Bz2O	7.09156	1	Triethylamine	28.7948	0.0908417	2	dmf	16.6713
22	0.355646	83.7116	2	Bz2O	6.65096	1	Triethylamine	29.0994	0.127375	7	dmf	12.0632
23	0.347169	84.8129	2	Bz2O	7.56356	1	Triethylamine	26.2786	0.117153	8	dmf	7.23233
24	1	0	2	Bz2O	7.23472	3	DBU	25.4735	0.120741	3	dmf	14.7988
25	0.330938	86.9215	2	Bz2O	6.82642	2	DIPEA	23.2171	0.110158	1	dmf	8.60363

## Sheet: CL7 (mono-galacto)
Experiment number	Result	Yield (%)	Benzoylating Reagent	Benzoylating Reagent Name	Eq. Benzoylating Reagent	Base	Base Name	Eq. Base	Concentration (M)	t1 (min)	solvent		Details
1	0.926492	11.0863	1	BzCl	8.73615	6	2,6-lutidine	3.21256	0.125815	3	mecn		Reaction	monobenzoylation of beta-galactoside
2	0.875062	18.8431	1	BzCl	8.87551	6	2,6-lutidine	28.7996	0.0887208	4	mecn		C sugar stock solution (M)	1.3
3	0.978308	3.27161	1	BzCl	8.98052	8	Pyridine	28.2247	0.0328476	19	dmf		High xi	1
4	0.924492	11.388	2	Bz2O	1.10357	1	Triethylamine	1.08627	0.12654	20	mecn_thf		Low xi	0.01
5	0.791892	31.3865	2	Bz2O	0.866014	1	Triethylamine	29.6993	0.141702	8	mecn_thf		xi changeover	18
6	1	0	1	BzCl	8.98715	4	2,4,6-collidine	25.6321	0.0390279	19	dmf_thf		Scoring function	abs(1 - (area/65))
7	1	0	2	Bz2O	8.88489	9	Aniline	21.0953	0.138446	3	dmf_dioxane		max area (100% yield)	43.0981
8	1	0	2	Bz2O	8.96696	9	Aniline	4.57534	0.118894	7	dmf_thf		Reaction Space	See Figure 6
9	1	0	2	Bz2O	0.75049	4	2,4,6-collidine	29.1794	0.126296	4	dmf_thf
10	0.810492	28.5813	2	Bz2O	3.60726	1	Triethylamine	28.3235	0.0657035	6	dioxane_thf
11	0.745446	38.3915	2	Bz2O	2.87823	1	Triethylamine	29.4782	0.124192	12	thf
12	0.921108	11.8984	2	Bz2O	8.7908	6	2,6-lutidine	26.5432	0.135765	2	mecn_thf
13	1	0	2	Bz2O	8.96855	5	2,4-lutidine	29.6827	0.0328961	2	mecn_dmf
14	0.999769	0.0348074	1	BzCl	0.801555	5	2,4-lutidine	29.5535	0.141912	1	dioxane_thf
15	0.928985	10.7104	1	BzCl	0.951109	1	Triethylamine	29.1868	0.124528	2	dmf_dioxane
16	0.867292	20.0148	1	BzCl	1.45943	1	Triethylamine	25.9239	0.134142	18	dmf_dioxane
17	1	0	2	Bz2O	0.75696	8	Pyridine	29.9351	0.135176	2	dmf
18	1	0	2	Bz2O	0.954471	7	2-methylpyridine	26.7724	0.142983	20	thf
19	0.746338	38.2569	2	Bz2O	4.00327	1	Triethylamine	28.923	0.0900926	3	thf
20	0.718277	42.4891	2	Bz2O	2.19979	1	Triethylamine	28.7219	0.119558	8	dioxane
21	0.866492	20.1354	2	Bz2O	2.82347	1	Triethylamine	25.3173	0.0366968	6	mecn_thf
22	0.708769	43.923	2	Bz2O	4.21539	1	Triethylamine	26.0374	0.0942697	4	dioxane
23	0.783415	32.665	2	Bz2O	1.88714	1	Triethylamine	11.2088	0.13027	3	dioxane
24	0.774338	34.034	2	Bz2O	4.1301	1	Triethylamine	27.8426	0.136175	19	dioxane
25	0.750569	37.6188	2	Bz2O	3.64905	1	Triethylamine	22.8787	0.101232	18	dioxane
